# Supplementary material for: Photo-induced copper-mediated polymerization of methyl acrylate in continuous flow reactors
Source: Royal Society of Chemistry journal article supplement (doi:10.1039/c3py01762a), 2014-01-01
Supplement: c3py01762a1.pdf [file c3py01762a1.pdf]

## Supporting Information

to

# Photo-induced Copper-Mediated Polymerization of Methyl Acrylate in Continuous Flow Reactors

Benjamin Wenn,<sup>a†</sup> Matthias Conradi,<sup>a†</sup> Andre Demetrio Carreiras,<sup>a,b</sup> David M. Haddleton,<sup>c</sup>

Tanja Junkers<sup>a\*</sup>

<sup>a</sup>

Polymer Reaction Design Group, Institute for Materials Research (IMO-IMOMEC),  
Universiteit Hasselt, Agoralaan Building D, B-3590 Diepenbeek, Belgium

<sup>b</sup>

Escola Polytechnica da Universidade de São Paulo, Associação de Engenharia Química,  
Avenida Professor Luciano Gualberto, Travessa 3, n° 380, Butantã - São Paulo, 05508-010,

<sup>c</sup> Department of Chemistry, University of Warwick, Coventry, CV4 7AL, United Kingdom

Brazil

† Equal contribution of both authors

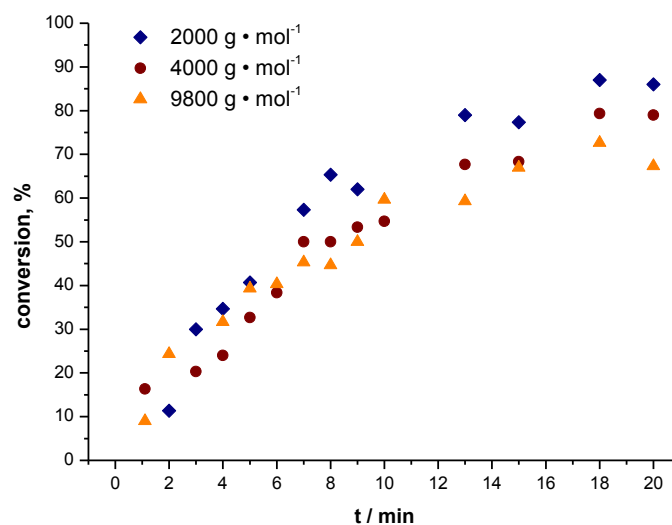

**Figure S1:** Evolution of monomer conversion with reaction time of UV-induced copper-mediated radical polymerization of MA in the milli-flow reactor with target  $M_n = 2000$  (◆), 4000 (●) and 9800 (▲) g · mol<sup>-1</sup>.

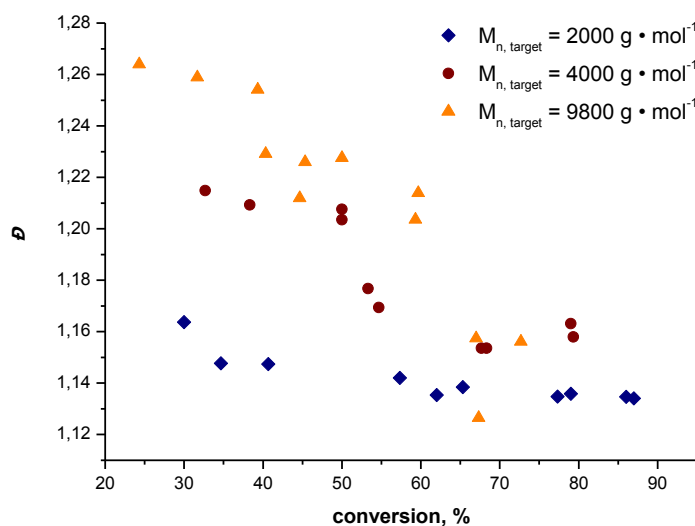

**Figure S2:** Decrease of the dispersity with monomer conversion of MA polymerizations in a milli-flow reactor via UV-induced copper-mediated radical polymerization, with target  $M_n = 2000$  (◆), 4000 (●) and 9800 (▲) g · mol<sup>-1</sup>.

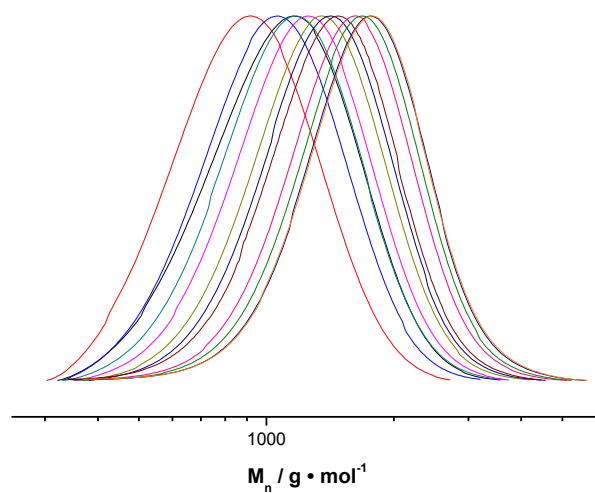

**Figure S3:** Molecular weight distributions with increasing residence time in the milli-flow reactor during a UV-induced copper-mediated radical polymerization of MA (target  $M_n = 2000 \text{ g} \cdot \text{mol}^{-1}$ )

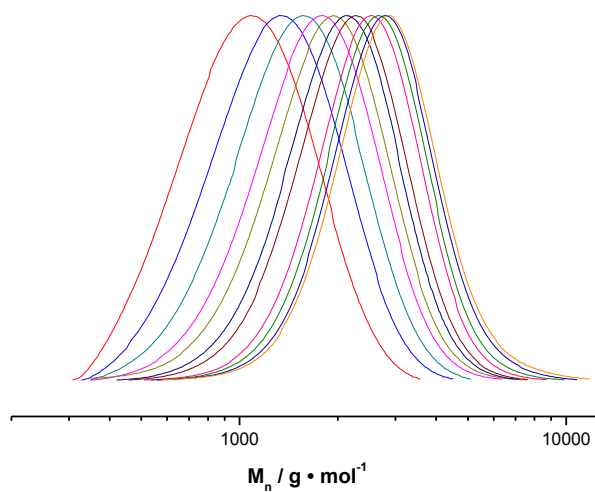

**Figure S4:** Molecular weight distributions with increasing residence time in the milli-flow reactor during a UV-induced copper-mediated radical polymerization of MA (target  $M_n = 4000 \text{ g} \cdot \text{mol}^{-1}$ )

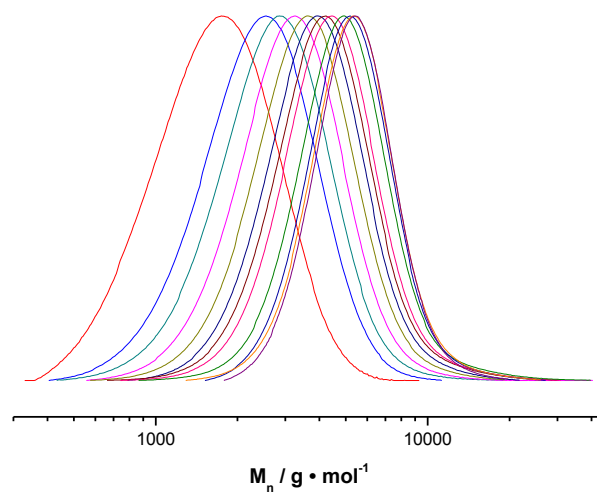

**Figure S5:** Molecular weight distributions with increasing residence time in the milli-flow reactor during a UV-induced copper-mediated radical polymerization of MA (target  $M_n = 9800 \text{ g} \cdot \text{mol}^{-1}$ ).

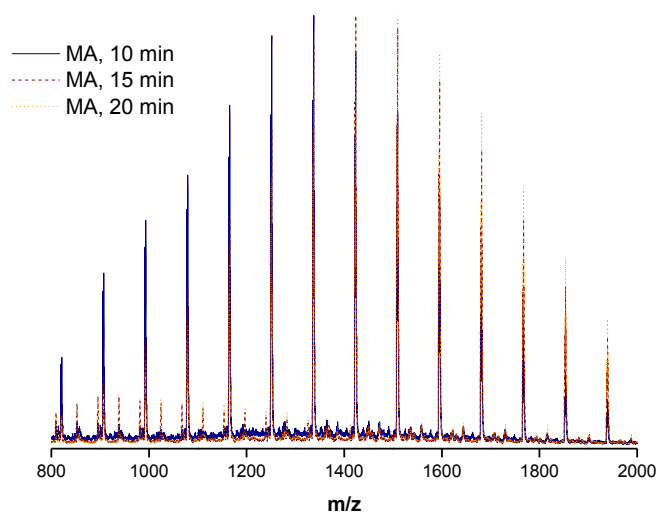

**Figure S6:** Full ESI-MS spectra of pMA (target  $M_n = 2000 \text{ g} \cdot \text{mol}^{-1}$ ) obtained by UV-induced copper-mediated radical polymerization at residence times of 10, 15 and 20 minutes in the milli-flow reactor
